# Supplementary material
Source: Springer Nature journal article supplement (https://www.springermedizin.de/resource/supplementary/13058_2004_946_MOESM7_ESM.pdf/9705688)

**AZ-1 ( $\mu\text{M}$ )**

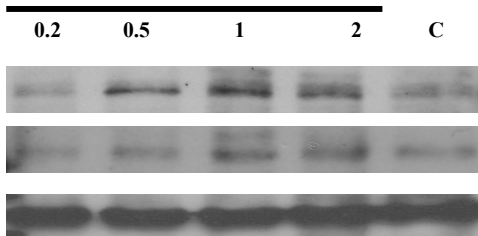

**AZ-1 ( $\mu\text{M}$ )**

| <b>Protein</b> | <b>0.2</b>  | <b>0.5</b>  | <b>1</b>    | <b>2</b>    | <b>C</b> |
|----------------|-------------|-------------|-------------|-------------|----------|
| <b>p53</b>     | <b>0.96</b> | <b>1.11</b> | <b>1.43</b> | <b>1.31</b> | <b>1</b> |
| <b>p21</b>     | <b>1.03</b> | <b>1.06</b> | <b>1.18</b> | <b>1.22</b> | <b>1</b> |

Supplement: MOESM7 [file 9705688]
